# Supplementary material for: Evolutionary responses to codon usage of horizontally transferred genes in Pseudomonas aeruginosa: gene retention, amelioration and compensatory evolution
Source: PubMed Central journal article supplement (PMC8461475; doi:10.1099/mgen.0.000587), 2021-06-24
Supplement: mgen-7-0587-s001.pdf [file mgen-7-0587-s001.pdf]

# Figure S1

Schematic overview of the bioinformatic pipeline used in this study. A: pan-genome analysis; B. strain phylogeny; C. Filter accessory genes. D. Ancestral state reconstruction and inference of HGT's

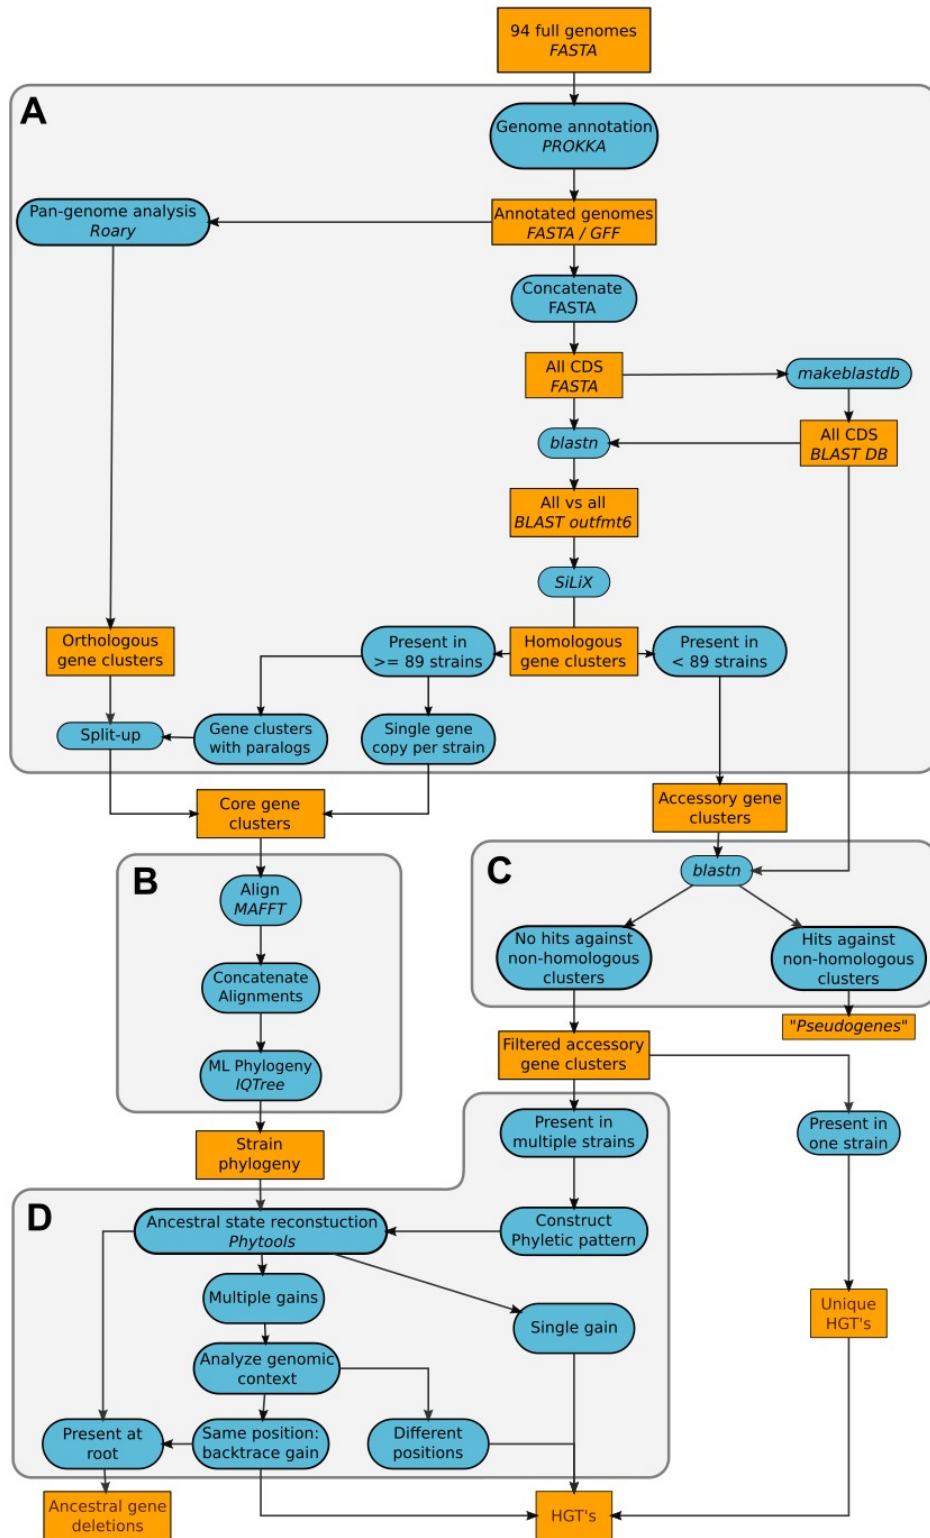

# Figure S2

Phylogenetic tree containing the *P. aeruginosa* strains used in this study. The tree was produced using the concatenated alignment of all the core genes and inferred using a GTR+F+R9 model of substitution. The tree was rooted at midpoint. Branch support was obtained with 1000 bootstrap replicates. Bootstrap values are indicated on the nodes.

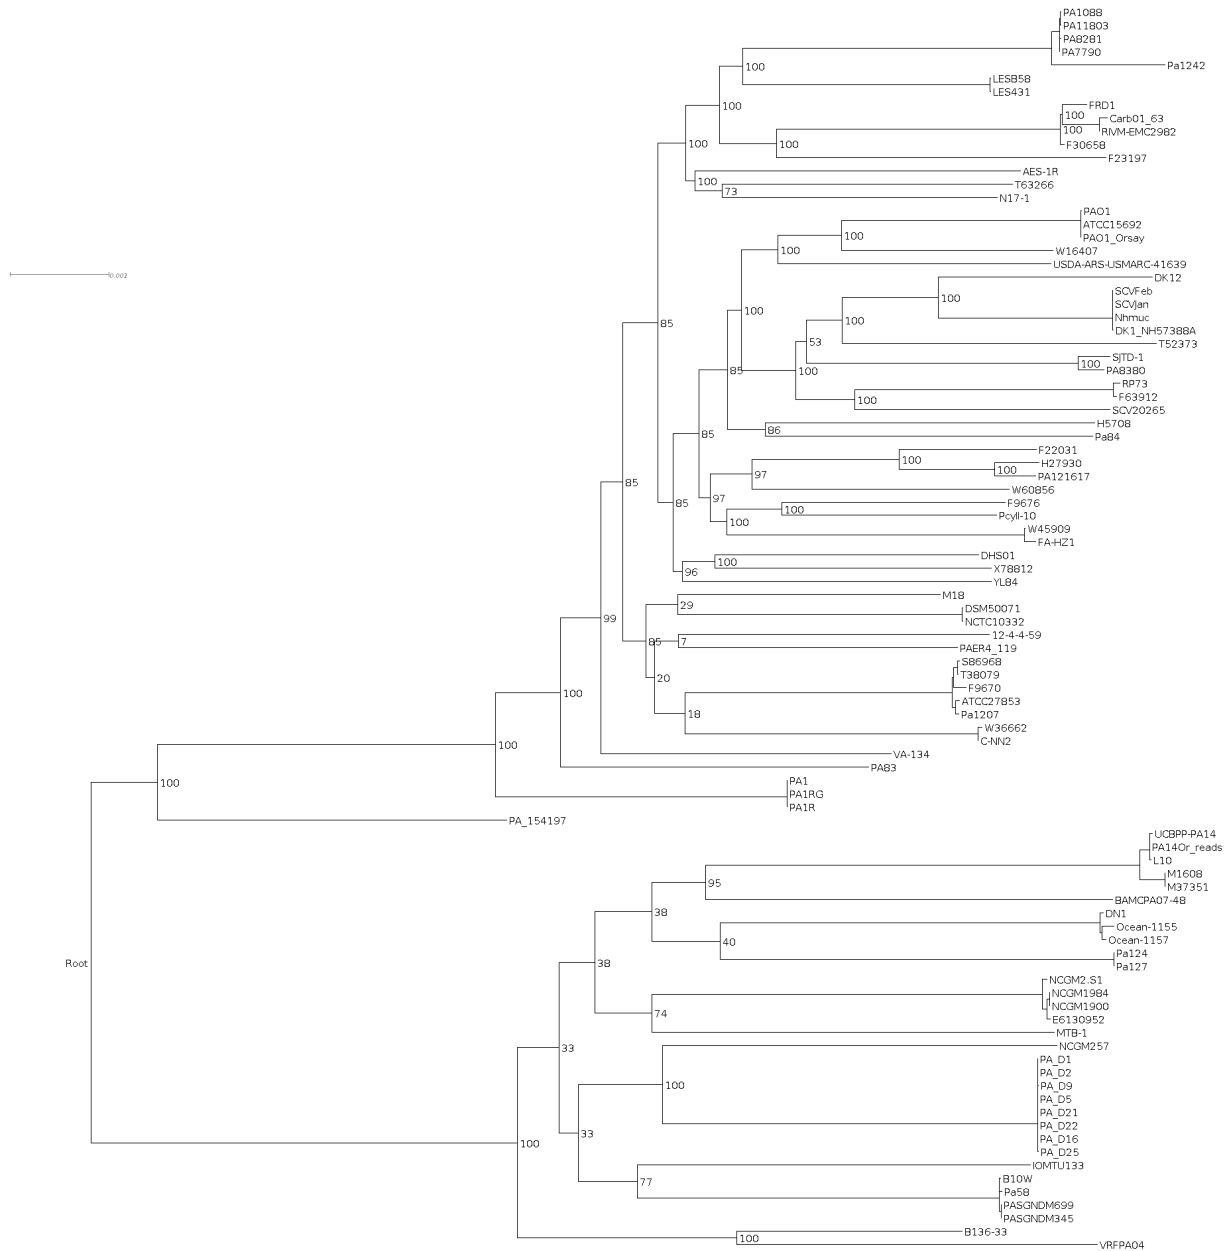

## Figure S3

**Distribution of the residence time of genes acquired by HGT.** The largest fraction of genes were recently acquired, while at longer residence times the amount of genes was strongly reduced. The inset shows the distribution of distances between the tree tips and all internal nodes of the strain phylogeny, indicating that the gaps in the distribution of residence time are potentially caused by the structure of the strain phylogeny.

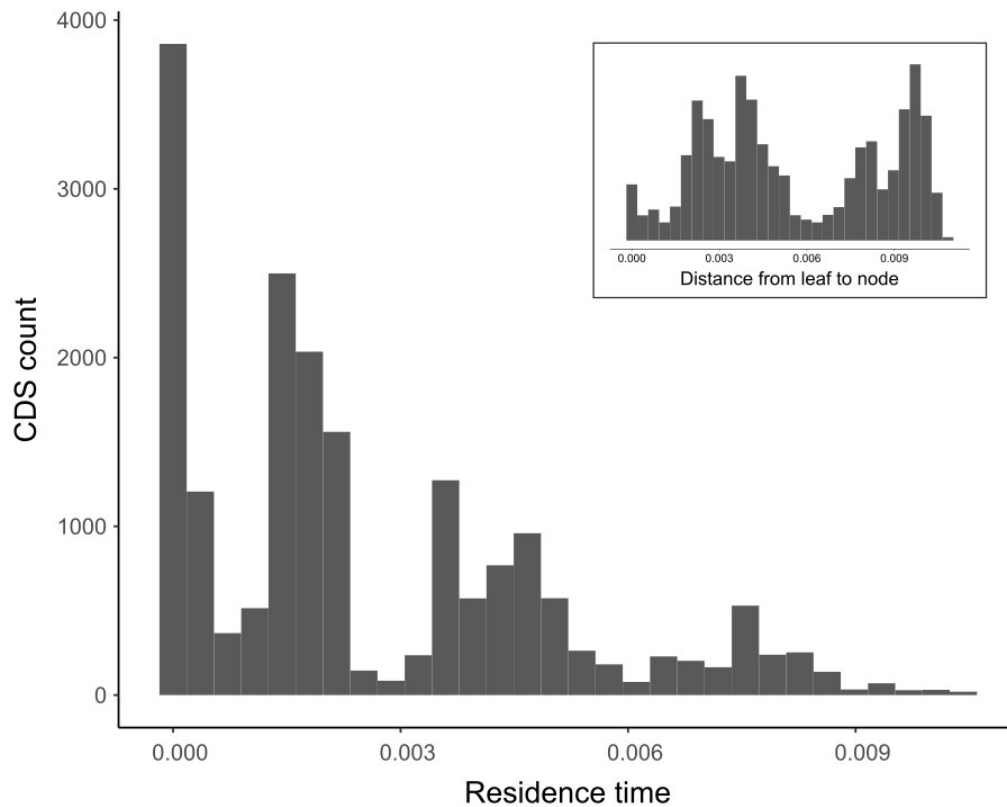

## Figure S4

**Codon usage bias of HGT genes in relation to their residence time.** Scatterplot of the CAI value of HGT genes in function of their residence time. The blue and red regression lines were determined by taking respectively the minimal and maximal CAI value for each residence time interval of 0.001.

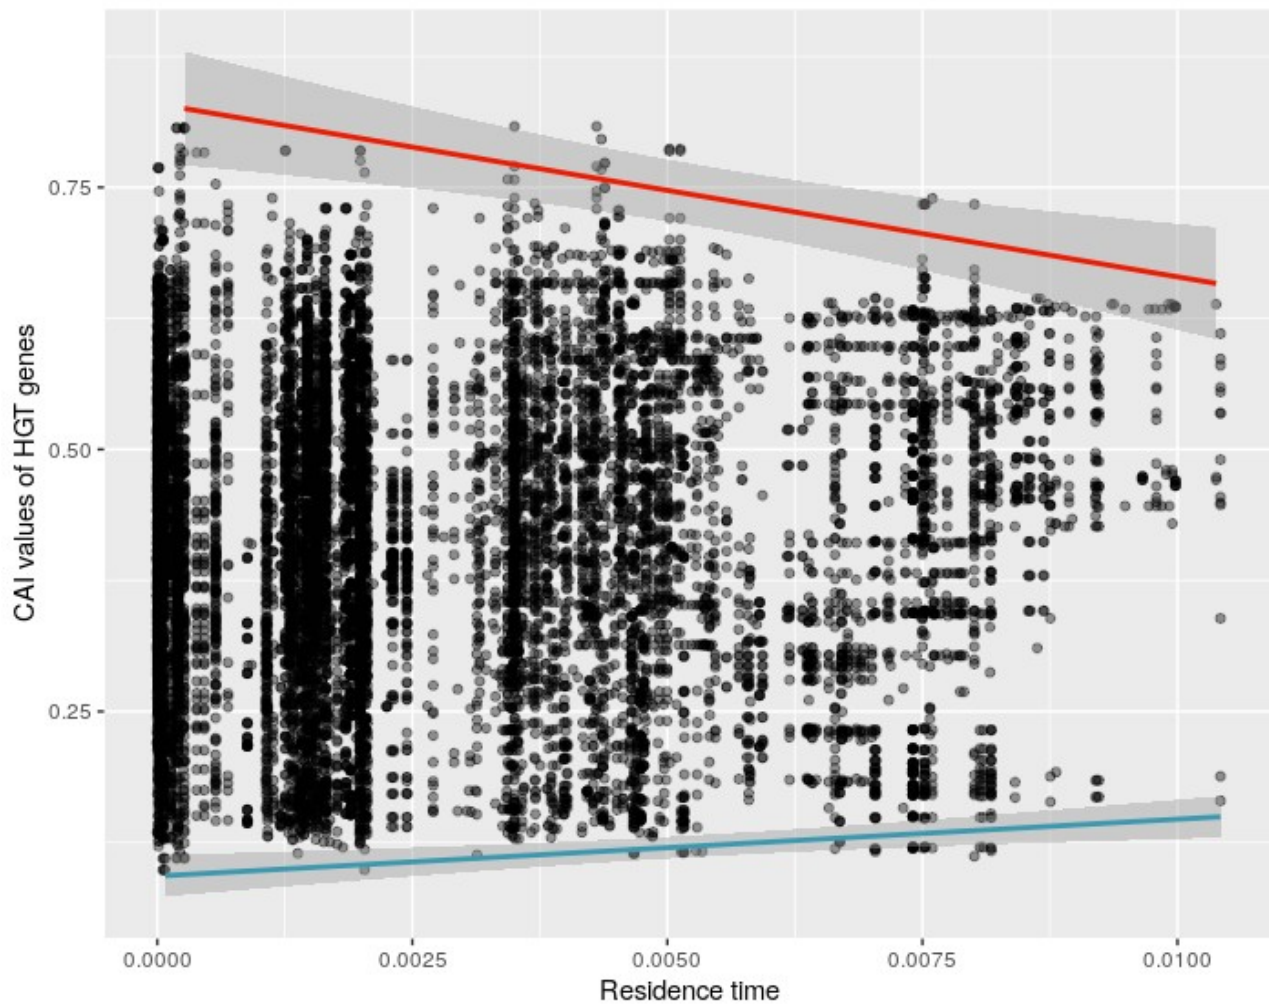

## Figure S5

**Variation in tRNA gene copy number in *P. aeruginosa*.** Each tRNA gene is specified by its anticodon, isoacceptor tRNA's are grouped by amino acid. The y-axis indicates the copy number that was observed for a specific tRNA gene, the circle size indicates the relative fraction of strains having a specific tRNA gene copy number.

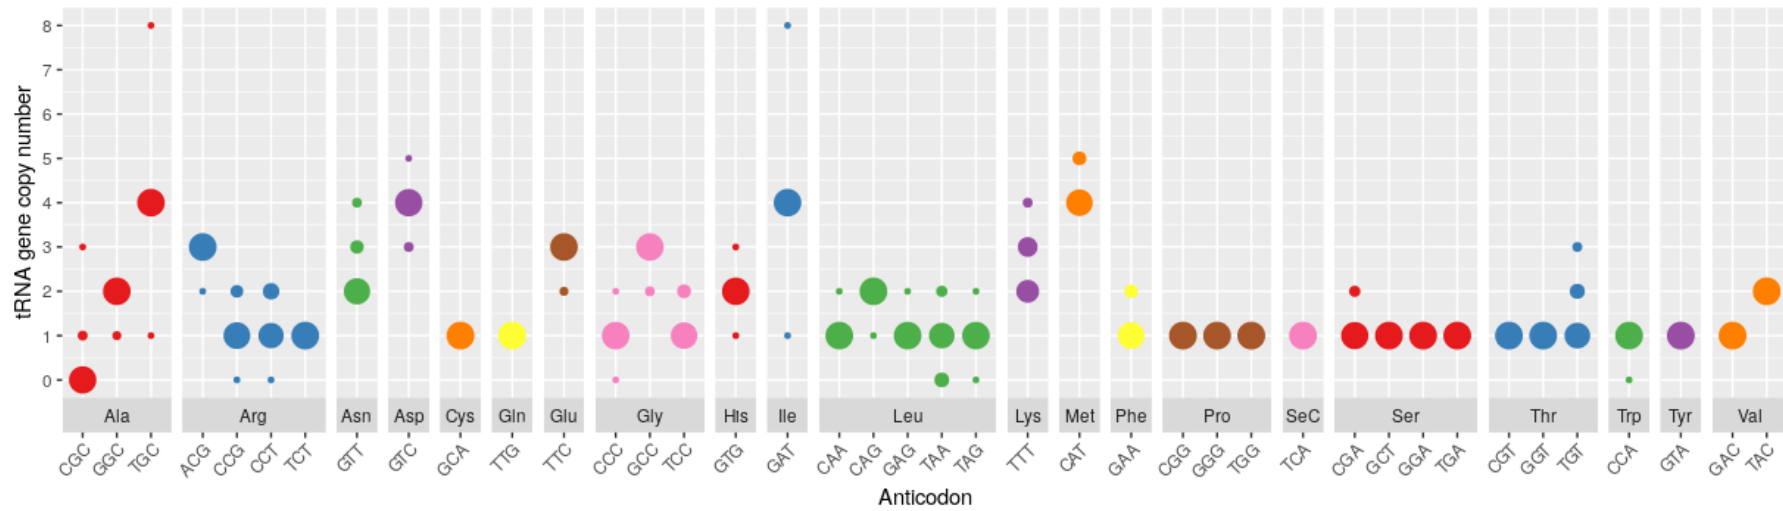

**Table S1:** *P. aeruginosa* genome data used in this study

| Strain_name    | RefSeq_accession | Environment | Comment                | Genome_size(bp) | CDS_ncbi | CDS_prokka |
|----------------|------------------|-------------|------------------------|-----------------|----------|------------|
| PAO1           | GCF_000006765    | Laboratory  | Type strain            | 6264404         | 5571     | 5671       |
| UCBPP-PA14     | GCF_000014625    | Clinical    |                        | 6537648         | 5892     | 5901       |
| LESB58         | GCF_000026645    | Clinical    |                        | 6601757         | 5931     | 6048       |
| AES-1R         | GCF_000220025    | Clinical    |                        | 6267620         | na       | 5839       |
| M18            | GCF_000226155    | Rhizosphere |                        | 6327754         | 5684     | 5758       |
| DK12           | GCF_000271365    | Clinical    |                        | 6402658         | 5884     | 5855       |
| SJTD-1         | GCF_000271985    | Soil        |                        | 6243825         | 5603     | 5637       |
| NCGM2.S1       | GCF_000284555    | Clinical    |                        | 6764661         | 6269     | 6214       |
| B136-33        | GCF_000359505    | Clinical    |                        | 6421010         | 5828     | 5811       |
| RP73           | GCF_000414035    | Clinical    |                        | 6342034         | 5762     | 5791       |
| VRFPA04        | GCF_000473745    | Clinical    |                        | 6818030         | 5778     | 6128       |
| DHS01          | GCF_000496455    | Clinical    |                        | 7055752         | 6524     | 6605       |
| PA1            | GCF_000496605    | Clinical    |                        | 6498072         | 5902     | 5938       |
| PA1R           | GCF_000496645    | Clinical    |                        | 6309305         | 5612     | 5776       |
| MTB-1          | GCF_000504045    | Soil        |                        | 6580038         | 6078     | 5991       |
| LES431         | GCF_000508765    | Clinical    |                        | 6550070         | 5964     | 5995       |
| SCV20265       | GCF_000510305    | Clinical    |                        | 6725183         | 6299     | 6175       |
| YL84           | GCF_000524595    | Soil        | Compost                | 6433441         | 5821     | 5843       |
| F22031         | GCF_000816985    | Clinical    |                        | 6603099         | 6077     | 6014       |
| NCGM1984       | GCF_000829255    | Clinical    |                        | 6850954         | 6291     | 6299       |
| NCGM1900       | GCF_000829275    | Clinical    |                        | 6814936         | 6358     | 6299       |
| FRD1           | GCF_000829885    | Clinical    |                        | 6712339         | 5852     | 6184       |
| Carb01_63      | GCF_000981825    | Clinical    |                        | 7497593         | 6900     | 7010       |
| DSM50071       | GCF_001045685    | Laboratory  | Type strain            | 6317050         | 5710     | 5730       |
| F9676          | GCF_001077475    | Plant       | From diseased rice s   | 6368008         | 5721     | 5759       |
| PA1RG          | GCF_001293085    | Clinical    | Bacteriophage resista  | 6500439         | 5910     | 5943       |
| VA-134         | GCF_001447845    | Clinical    | Isolated from burn pat | 6400418         | 5725     | 5799       |
| NCTC10332      | GCF_001457615    | Laboratory  | Type strain            | 6316979         | 5778     | 5773       |
| 12-4-4(59)     | GCF_001482325    | Clinical    | Blood culture of a bur | 6431911         | 5802     | 5850       |
| S86968         | GCF_001515845    | Clinical    | From cancer patient    | 6934277         | 6436     | 6348       |
| T38079         | GCF_001515915    | Clinical    | From cancer patient    | 6795741         | 6215     | 6205       |
| T52373         | GCF_001516005    | Clinical    | From cancer patient    | 6322459         | 5720     | 5734       |
| T63266         | GCF_001516105    | Clinical    | From cancer patient    | 6456866         | 5952     | 5907       |
| W16407         | GCF_001516165    | Clinical    | From cancer patient    | 6808844         | 6262     | 6254       |
| W36662         | GCF_001516185    | Clinical    | From cancer patient    | 6791731         | 6291     | 6186       |
| W45909         | GCF_001516205    | Clinical    | From cancer patient    | 6777566         | 6322     | 6214       |
| W60856         | GCF_001516225    | Clinical    | From cancer patient    | 6896700         | 6397     | 6304       |
| F23197         | GCF_001516245    | Clinical    | From cancer patient    | 6517340         | 5968     | 5890       |
| F30658         | GCF_001516265    | Clinical    | From cancer patient    | 7273258         | 6760     | 6695       |
| H5708          | GCF_001516305    | Clinical    | From cancer patient    | 6334378         | 5849     | 5731       |
| H27930         | GCF_001516325    | Clinical    | From cancer patient    | 6568228         | 6003     | 5948       |
| M1608          | GCF_001516365    | Clinical    | From cancer patient    | 6460023         | 5940     | 5883       |
| M37351         | GCF_001516385    | Clinical    | From cancer patient    | 6897231         | 6390     | 6349       |
| USDA-ARS-USMAR | GCF_001518975    | Mammal      | Cow with bovine resp   | 6364583         | 5775     | 5760       |
| X78812         | GCF_001542795    | Clinical    | From cancer patient    | 6348761         | 5836     | 5729       |
| F9670          | GCF_001542835    | Clinical    | From cancer patient    | 6794354         | 6071     | 6266       |
| NCGM257        | GCF_001547955    | Clinical    | Urinary infection      | 7090694         | 6892     | 6618       |
| PA8380         | GCF_001548135    | Clinical    | Human gut              | 6613260         | 6198     | 6047       |
| IOMTU133       | GCF_001548335    | Clinical    | Multidrug resistant    | 6897018         | 6433     | 6281       |
| F63912         | GCF_001594325    | Clinical    | From cancer patient    | 6618768         | 6211     | 6099       |
| N17-1          | GCF_001606045    | Soil        | Aflatoxin degrading st | 6370730         | 5763     | 5801       |
| ATCC27853      | GCF_001618925    | Clinical    | Nosocomial infection   | 6827737         | 6239     | 6287       |
| BAMCPA07-48    | GCF_001632245    | Clinical    | Combat injury wound    | 7021552         | 6355     | 6533       |
| PA121617       | GCF_001679685    | Clinical    | Sputum from respiratc  | 6853510         | 6225     | 6280       |
| PA_D1          | GCF_001721745    | Clinical    | Sputum from ventilatc  | 6643823         | 6017     | 6033       |
| PA_D2          | GCF_001721765    | Clinical    | Sputum from ventilatc  | 6642996         | 6017     | 6030       |
| PA_D9          | GCF_001721785    | Clinical    | Sputum from ventilatc  | 6645477         | 6014     | 6040       |
| PA_D16         | GCF_001721805    | Clinical    | Sputum from ventilatc  | 6681975         | 6042     | 6070       |
| PA_D22         | GCF_001721825    | Clinical    | Sputum from ventilatc  | 6681981         | 6037     | 6072       |
| PA_D25         | GCF_001721845    | Clinical    | Sputum from ventilatc  | 6683204         | 6036     | 6080       |
| DN1            | GCF_001722005    | Soil        |                        | 6959251         | 6024     | 6470       |
| PA_D5          | GCF_001722025    | Clinical    | Sputum from ventilatc  | 6681992         | 6042     | 6065       |
| PA_D21         | GCF_001722045    | Clinical    | Sputum from ventilatc  | 6639108         | 6012     | 6031       |
| ATCC15692      | GCF_001729505    | Clinical    | Infected wound         | 6276434         | 5667     | 5693       |
| FA-HZ1         | GCF_001750705    | Wastewater  | DBF degrading strain   | 6866790         | 6064     | 6439       |
| PA1088         | GCF_001792835    | Clinical    | Urine                  | 6721480         | 6199     | 6160       |
| PA8281         | GCF_001792855    | Clinical    | Tracheal aspirate      | 6928736         | 6426     | 6392       |
| PA11803        | GCF_001792875    | Clinical    | Bloodstream            | 7006578         | 6582     | 6562       |
| PA7790         | GCF_001870265    | Clinical    | Tracheal aspirate      | 7067711         | 6600     | 6577       |
| B10W           | GCF_001874465    | Wastewater  |                        | 6723378         | 6069     | 6168       |

|              |               |            |                      |         |      |      |
|--------------|---------------|------------|----------------------|---------|------|------|
| PAER4_119    | GCF_001879525 | Laboratory | Lindberg collection  | 6504659 | 5881 | 5881 |
| SCVFeb       | GCF_001900195 | Mammal     | Murine model         | 6213026 | 5619 | 5627 |
| SCVJan       | GCF_001900225 | Mammal     | Murine model         | 6213029 | 5619 | 5627 |
| Nhmuc        | GCF_001900265 | Clinical   |                      | 6213276 | 5619 | 5628 |
| PA_154197    | GCF_002075065 | Clinical   |                      | 6445239 | 5863 | 5856 |
| RIVM-EMC2982 | GCF_002085605 | Clinical   |                      | 7380063 | 6762 | 6873 |
| E6130952     | GCF_002085755 | Clinical   | Respiratory failure  | 7077406 | 6586 | 6592 |
| PASGNDM699   | GCF_002104595 | Clinical   | NDM-1 producing stre | 6985102 | 6428 | 6426 |
| PASGNDM345   | GCF_002104615 | Clinical   | NDM-1 producing stre | 6893164 | 6316 | 6328 |
| Pa124        | GCF_002192475 | Clinical   | Ventilator-associate | 7008516 | 6369 | 6385 |
| Pa58         | GCF_002192495 | Clinical   | Ventilator-associate | 7241575 | 6564 | 6730 |
| Pa84         | GCF_002205335 | Clinical   | Ventilator-associate | 6566724 | 5964 | 6034 |
| Pa127        | GCF_002205355 | Clinical   | Ventilator-associate | 7148302 | 6459 | 6574 |
| Pa1242       | GCF_002205375 | Clinical   | Blood                | 7050510 | 6212 | 6584 |
| Pa1207       | GCF_002208645 | Clinical   | Blood                | 7411863 | 6721 | 6905 |
| PA83         | GCF_002215345 | Clinical   | Blood                | 7214314 | 6610 | 6622 |
| L10          | GCF_002223805 | Marine     | Halobiotic reed      | 6661962 | 6137 | 6018 |
| Ocean-1155   | GCF_002237405 | Marine     | Open ocean, Pacific  | 6952237 | 6361 | 6398 |
| Ocean-1157   | GCF_002237425 | Marine     | Open ocean, Pacific  | 6943220 | 6359 | 6383 |
| DK1_NH57388A | GCF_900069025 | Clinical   | Sputum               | 6212531 | 5610 | 5629 |
| PAO1_Orsay   | GCF_900070375 | Laboratory |                      | 6276469 | 5682 | 5681 |
| PA14Or_reads | GCF_900095805 | Laboratory |                      | 6541482 | 5910 | 5897 |
| PcyII-10     | GCF_900149285 | Clinical   | Burn patient         | 6288645 | 5706 | 5687 |
| C-NN2        | GCF_900185255 | Clinical   | Cystic fibrosis lung | 6902967 | 6601 | 6304 |

**Table S2:** Codon usage in the core genome of *P. aeruginosa*

| Codon | Amino Acid | Fraction | Frequency | Number   |
|-------|------------|----------|-----------|----------|
| GCA   | A          | 0.038    | 4.396     | 704353   |
| GCC   | A          | 0.59     | 68.811    | 11024870 |
| GCG   | A          | 0.336    | 39.228    | 6285202  |
| GCT   | A          | 0.036    | 4.222     | 676495   |
| TGC   | C          | 0.91     | 9.129     | 1462659  |
| TGT   | C          | 0.09     | 0.905     | 144930   |
| GAC   | D          | 0.815    | 43.092    | 6904270  |
| GAT   | D          | 0.185    | 9.77      | 1565407  |
| GAA   | E          | 0.385    | 23.591    | 3779779  |
| GAG   | E          | 0.615    | 37.687    | 6038167  |
| TTC   | F          | 0.962    | 34.173    | 5475215  |
| TTT   | F          | 0.038    | 1.343     | 215176   |
| GGA   | G          | 0.045    | 3.725     | 596750   |
| GGC   | G          | 0.747    | 62.16     | 9959261  |
| GGG   | G          | 0.115    | 9.601     | 1538310  |
| GGT   | G          | 0.093    | 7.711     | 1235476  |
| CAC   | H          | 0.717    | 15.635    | 2505004  |
| CAT   | H          | 0.283    | 6.185     | 990964   |
| ATA   | I          | 0.018    | 0.726     | 116379   |
| ATC   | I          | 0.922    | 38.07     | 6099574  |
| ATT   | I          | 0.06     | 2.477     | 396868   |
| AAA   | K          | 0.117    | 3.311     | 530487   |
| AAG   | K          | 0.883    | 25.046    | 4012921  |
| CTA   | L          | 0.01     | 1.214     | 194550   |
| CTC   | L          | 0.225    | 28.361    | 4544058  |
| CTG   | L          | 0.675    | 84.919    | 13605836 |
| CTT   | L          | 0.022    | 2.795     | 447830   |
| TTA   | L          | 0.001    | 0.17      | 27304    |
| TTG   | L          | 0.067    | 8.416     | 1348387  |
| ATG   | M          | 1        | 20.435    | 3274077  |
| AAC   | N          | 0.871    | 22.215    | 3559341  |
| AAT   | N          | 0.129    | 3.288     | 526734   |
| CCA   | P          | 0.038    | 1.944     | 311541   |
| CCC   | P          | 0.26     | 13.269    | 2126027  |
| CCG   | P          | 0.666    | 33.985    | 5445057  |
| CCT   | P          | 0.036    | 1.857     | 297490   |
| CAA   | Q          | 0.143    | 6.098     | 976997   |
| CAG   | Q          | 0.857    | 36.403    | 5832556  |
| AGA   | R          | 0.004    | 0.314     | 50298    |
| AGG   | R          | 0.024    | 1.816     | 290882   |
| CGA   | R          | 0.028    | 2.142     | 343139   |
| CGC   | R          | 0.661    | 50.68     | 8119945  |
| CGG   | R          | 0.183    | 14.042    | 2249799  |
| CGT   | R          | 0.1      | 7.684     | 1231203  |
| AGC   | S          | 0.478    | 25.952    | 4158115  |
| AGT   | S          | 0.042    | 2.289     | 366725   |
| TCA   | S          | 0.008    | 0.414     | 66400    |
| TCC   | S          | 0.22     | 11.948    | 1914303  |
| TCG   | S          | 0.24     | 13.01     | 2084456  |
| TCT   | S          | 0.012    | 0.647     | 103604   |
| ACA   | T          | 0.015    | 0.598     | 95772    |
| ACC   | T          | 0.804    | 32.823    | 5258956  |
| ACG   | T          | 0.147    | 5.989     | 959603   |
| ACT   | T          | 0.035    | 1.413     | 226466   |
| GTA   | V          | 0.055    | 3.754     | 601448   |
| GTC   | V          | 0.422    | 29.019    | 4649462  |
| GTG   | V          | 0.49     | 33.675    | 5395491  |
| GTT   | V          | 0.033    | 2.283     | 365766   |
| TGG   | W          | 1        | 15.004    | 2403880  |
| TAC   | Y          | 0.803    | 20.121    | 3223868  |
| TAT   | Y          | 0.197    | 4.929     | 789765   |
| TAA   | *          | 0.091    | 0.281     | 45020    |
| TAG   | *          | 0.112    | 0.346     | 55481    |
| TGA   | *          | 0.797    | 2.462     | 394443   |



**Table S3. Classification of inferred HGT genes to mobile genetic elements.** To detect potential ICE, phage, IS or plasmid related genes, inferred HGT genes were queried against the ICEberg (Liu et al. 2019), PHASTER (Arndt et al. 2016) , ISfinder (Siguier et al. 2006) and PLSDB (Galata et al. 2018) databases, respectively. HGT genes with at least one hit with an e-value > 1e-5 were counted for each type of MGE. As a single HGT gene can sometimes be found on different MGE, the number of HGT genes on 'Any MGE' is slightly lower than the sum for separate MGE's.

| <b>Mobile Genetic Element</b>          | <b>Number of HGT genes</b> | <b>% of HGT genes</b> |
|----------------------------------------|----------------------------|-----------------------|
| Integrative conjugative elements (ICE) | 427                        | 6.7                   |
| Phages and prophages                   | 1920                       | 30                    |
| Insertion sequences (IS)               | 366                        | 5.7                   |
| Plasmids                               | 2118                       | 33.1                  |
| Any MGE                                | 4384                       | 68.6                  |

**Table S4 HGT hotspots in the *P. aeruginosa* genome:** List of *P. aeruginosa* core genes (indicated by their reference PAO1 locus tag) where adjacent HGT events were frequently detected. The last column indicates the number of HGT events that were found to be adjacent to each core gene. Only core genes with 20 or more adjacent HGT events were included in this table.

| Core gene<br>(PAO1 locus tag) | Annotation                                                        | Number of adjacent<br>HGT events |
|-------------------------------|-------------------------------------------------------------------|----------------------------------|
| PA2229                        | Hypothetical protein                                              | 141                              |
| PA0730                        | (R)-3-hydroxydecanoyl-ACP:CoA transacylase                        | 122                              |
| PA2736.1                      | tRNA-Pro                                                          | 121                              |
| PA2729                        | Hypothetical protein                                              | 120                              |
| PA0709                        | (4S)-4-hydroxy-5-phosphonooxypentane-2,3-dione isomerase          | 119                              |
| PA2216                        | Hypothetical protein                                              | 113                              |
| PA0826.2                      | tmRNA                                                             | 101                              |
| PA0818                        | Hypothetical protein                                              | 100                              |
| PA4541                        | Heme/hemopexin-binding protein                                    | 89                               |
| PA4541.2                      | tRNA-Pro                                                          | 89                               |
| PA0976                        | 7-cyano-7-deazaguanine synthase                                   | 89                               |
| PA2820                        | Hypothetical protein                                              | 82                               |
| PA0988                        | 1,4-dihydroxy-2-naphthoyl-CoA hydrolase                           | 77                               |
| PA3824.1                      | tRNA-Leu                                                          | 74                               |
| PA1961                        | HTH-type transcriptional regulator DmlR                           | 74                               |
| PA1972                        | Phosphoethanolamine transferase EptA                              | 74                               |
| PA3825                        | Putative cyclic-di-GMP phosphodiesterase AdrB                     | 73                               |
| PA2817                        | Hypothetical protein                                              | 68                               |
| PA3619                        | Protein TolB                                                      | 68                               |
| PA2583                        | Virulence sensor protein BvgS                                     | 67                               |
| PA2584                        | CDP-diacylglycerol—glycerol-3-phosphate-3-phosphatidyltransferase | 67                               |
| PA3620                        | DNA mismatch repair protein MutS                                  | 67                               |
| PA1796.1                      | tRNA-Arg                                                          | 66                               |
| PA1797a                       | Hypothetical protein                                              | 66                               |
| PA2793                        | Hypothetical protein                                              | 63                               |
| PA2795                        | tRNA-dihydrouridine synthase A                                    | 63                               |
| PA1013                        | Phosphoribosylaminoimidazole-succinocarboxamide synthase          | 63                               |
| PA1014                        | Poly-beta-1,6-N-acetyl-D-glucosamine synthase                     | 63                               |
| PA3768                        | Multicopper oxidase mco                                           | 57                               |
| PA3769                        | GMP synthase                                                      | 57                               |
| PA0256                        | Hypothetical protein                                              | 51                               |
| PA2570                        | PA-I galactophilic lectin                                         | 51                               |
| PA2571                        | Sensor protein ZraS                                               | 51                               |
| PA4674                        | putative HTH-type transcriptional regulator YbaQ                  | 51                               |
| PA4673                        | Ribosome-binding ATPase YchF                                      | 48                               |
| PA2125                        | Glutarate-semialdehyde dehydrogenase DavD                         | 47                               |
| PA2603                        | Thiosulfate sulfurtransferase GlpE                                | 44                               |
| PA2603.1                      | tRNA-Ser                                                          | 44                               |
| PA4138                        | Tyrosine--tRNA ligase                                             | 43                               |
| PA4139                        | Hypothetical protein                                              | 43                               |
| PA3663                        | Hypothetical protein                                              | 43                               |
| PA3664                        | Regulatory protein Spx                                            | 43                               |
| PA2581                        | Hypothetical protein                                              | 40                               |
| PA2581.1                      | tRNA-Cys                                                          | 40                               |
| PA1934                        | Hypothetical protein                                              | 39                               |
| PA3141                        | UDP-N-acetyl-alpha-D-glucosamine C6 dehydratase                   | 36                               |
| PA3161                        | Integration host factor subunit beta                              | 33                               |
| PA3536                        | Hypothetical protein                                              | 30                               |
| PA3537                        | Ornithine carbamoyltransferase                                    | 30                               |
| PA4205                        | Hypothetical protein                                              | 29                               |
| PA4040                        | Hypothetical protein                                              | 27                               |
| PA4041                        | D(-)-tartrate dehydratase                                         | 24                               |
| PA1940                        | Hypothetical protein                                              | 23                               |
| PA4206                        | Efflux pump periplasmic linker BepF                               | 23                               |
| PA2822                        | Free methionine-R-sulfoxide reductase                             | 22                               |
| PA0961                        | Major cold shock protein CspA                                     | 21                               |
| PA1149                        | Hypothetical protein                                              | 21                               |
